# Supplementary material for: The Effect of tRNA[Ser]Sec Isopentenylation on Selenoprotein Expression
Source: MDPI journal article supplement (doi:10.3390/ijms222111454), 2021-10-23
Supplement: s1 [file s1]

**Table S1:** Antibodies used in this study

| Antibody             | Host species | Dilution | Manufacturer                | Catalogue number |
|----------------------|--------------|----------|-----------------------------|------------------|
| TRIT1                | Rabbit       | 1:1000   | Sigma                       | HPA024174        |
| TRIT1                | Rabbit       | 1:500    | Novus Biologicals           | NBP2-20727       |
| $\beta$ -ACTIN       | Mouse        | 1:25000  | Sigma                       | A3854            |
| $\alpha$ -TUBULIN    | Rabbit       | 1:2500   | Rockland                    | 600-401-880      |
| GPX1                 | Rabbit       | 1:1000   | Abcam                       | ab22604          |
| GPX4                 | Rabbit       | 1:1000   | Abcam                       | ab125066         |
| SELENOT              | Rabbit       | 1:250    | Sigma                       | HPA039780        |
| TXNRD1               | Mouse        | 1:1000   | Abcam                       | ab16847          |
| SELENOK              | Mouse        | 1:500    | Sigma                       | HPA008196        |
| SELENOS              | Rabbit       | 1:1000   | Sigma                       | HPA010025        |
| SELENOF              | Rabbit       | 1:5000   | Abcam                       | ab124840         |
| SELENOW              | Rabbit       | 1:2000   | Rockland                    | 600401A29        |
| SELENOP              | Rabbit       | 1:400    | Immunoglobe                 | 0122-03          |
| SEPHS2               | Rabbit       | 1:2000   | Rockland                    | 200-401-999      |
| HRP goat anti mouse  | Goat         | 1:1000   | Jackson Immunosci (Dianova) | 115-035-003      |
| HRP goat anti rabbit | Goat         | 1:1000   | Jackson Immunosci (Dianova) | 111-035-003      |

**Table S2:** Specific annealing temperatures used to determine modification index by qPCR

|       | tRNA                        | Annealing temperature |
|-------|-----------------------------|-----------------------|
| Human | mt-tRNA <sup>Phe</sup>      | 58.3°C                |
|       | mt-tRNA <sup>Ser(UCN)</sup> | 59.2°C                |
|       | mt-tRNA <sup>Tyr</sup>      | 60.2°C                |
|       | mt-tRNA <sup>Trp</sup>      | 62°C                  |
|       | mt-tRNA <sup>Cys</sup>      | 61°C                  |

**Table S3.** Primers used for *TRIT1* cloning, site-direct mutagenesis to introduce R323Q patient mutation

| Purpose                     | Primer         | Sequence (5'-3')                                                                      |
|-----------------------------|----------------|---------------------------------------------------------------------------------------|
| <b><i>TRIT1</i> cloning</b> | hTRIT1_Fw_NcoI | ACTGCCATGGCGTCCGTGGCGGCTGCACG<br>AGCAG                                                |
|                             | hTrit1_Rv_His  | CAGTCCTAGGTTAATTAGTGGTGGTGAT<br>GGTGATGATGGTGGTGATGAGCGGAAAC<br>GCTGCATTTCAGCTCTTGATC |
| <b>R323Q point mutation</b> | hTRIT1g982a_Fw | GTAACCTAAGAGATATGCCAGAAACAAA<br>ACCGATGGGTT                                           |
|                             | hTRIT1g982a_Rv | AACCCATCGGTTTTGTTTCTGGGCATATC<br>TCTTAGTTAC                                           |

**Table S4:** Anticodon stem loop (ASL) RNA primers used for TRIT1 assay. Mutated A>G Sec ASL at position 37 (in bold) was used as negative control.

|                          | <b>RNA Primer</b> | <b>Sequence (5'-3')</b>            |
|--------------------------|-------------------|------------------------------------|
| <b>Cytosolic ASL</b>     | Ser (UGA)         | GA-UGG-ACU-UGA-AAU-CCA-UU          |
|                          | Ser (AGA)         | GA-UGG-ACU-AGA-AAU-CCA-UU          |
|                          | Ser (CGA)         | GU-UGG-ACU-CGA-AAU-CCA-AU          |
|                          | Sec (UCA)         | UG-CAG-GCU-UCA-AAC-CUG-UA          |
| <b>Mitochondrial ASL</b> | Cys (GCA)         | AU-UGA-AUU-GCA-AAU-UCG-AA          |
|                          | Ser (UGA)         | GG-UUG-GCU-UGA-AAC-CAG-CU          |
|                          | Trp (UCA)         | AA-GAG-CCU-UCA-AAG-CCC-UC          |
|                          | Tyr (GUA)         | AU-UGG-ACU-GUA-AAU-CUA-AA          |
| <b>Negative control</b>  | Sec (UCA) A37G    | UG-CAG-GCU-UCA- <b>GAC</b> -CUG-UA |
